# Supplementary material
Source: publisher figshare collection journal article supplement (https://acs.figshare.com/ndownloader/files/5218228)
Supplement: Supplementary file 1 [file 5218228]

 
data_snt17b
 
_audit_creation_method            SHELXL-97
_chemical_name_systematic
;
 ?
;
_chemical_name_common             ?
_chemical_melting_point           ?
_chemical_formula_moiety          ?
_chemical_formula_sum
 'C10 H13.33 O2'
_chemical_formula_weight          165.54
_chemical_absolute_configuration   rm
 
loop_
 _atom_type_symbol
 _atom_type_description
 _atom_type_scat_dispersion_real
 _atom_type_scat_dispersion_imag
 _atom_type_scat_source
 'C'  'C'   0.0181   0.0091
 'International Tables Vol C Tables 4.2.6.8 and 6.1.1.4'
 'H'  'H'   0.0000   0.0000
 'International Tables Vol C Tables 4.2.6.8 and 6.1.1.4'
 'O'  'O'   0.0492   0.0322
 'International Tables Vol C Tables 4.2.6.8 and 6.1.1.4'
 
_symmetry_cell_setting            orthorhombic
_symmetry_space_group_name_H-M    P212121
 
loop_
 _symmetry_equiv_pos_as_xyz
 'x, y, z'
 '-x+1/2, -y, z+1/2'
 'x+1/2, -y+1/2, -z'
 '-x, y+1/2, -z+1/2'
 
_cell_length_a                    8.4882(2)
_cell_length_b                    10.2664(2)
_cell_length_c                    15.0606(2)
_cell_angle_alpha                 90.00
_cell_angle_beta                  90.00
_cell_angle_gamma                 90.00
_cell_volume                      1312.43(4)
_cell_formula_units_Z             6
_cell_measurement_temperature     100(1)
_cell_measurement_reflns_used     ?
_cell_measurement_theta_min       ?
_cell_measurement_theta_max       ?
 
_exptl_crystal_description        block
_exptl_crystal_colour             colorless
_exptl_crystal_size_max           0.3
_exptl_crystal_size_mid           0.2
_exptl_crystal_size_min           0.2
_exptl_crystal_density_meas       ?
_exptl_crystal_density_diffrn     1.257
_exptl_crystal_density_method     'not measured'
_exptl_crystal_F_000              536
_exptl_absorpt_coefficient_mu     0.693
_exptl_absorpt_correction_T_min                   0.90311
_exptl_absorpt_correction_T_max                   1.00000
_exptl_absorpt_correction_type            'multi-scan'
_exptl_absorpt_process_details    ?
 
_exptl_special_details
;
CrysAlisPro, Agilent Technologies,
Version 1.171.35.19 (release 27-10-2011 CrysAlis171 .NET)
(compiled Oct 27 2011,15:02:11)
Empirical absorption correction using spherical harmonics,
 implemented in SCALE3 ABSPACK scaling algorithm.
;
_diffrn_ambient_temperature       100(1)
_diffrn_radiation_wavelength      1.54184
_diffrn_radiation_type            CuK\a
_diffrn_radiation_source 'SuperNova (Cu) X-ray Source'
_diffrn_radiation_monochromator 'mirror'
_diffrn_measurement_device_type 'SuperNova, Dual, Cu at zero, Eos'
_diffrn_detector_area_resol_mean 16.2974
_diffrn_measurement_method        ?
_diffrn_standards_number          ?
_diffrn_standards_interval_count  ?
_diffrn_standards_interval_time   ?
_diffrn_standards_decay_%         ?
_diffrn_reflns_number             3191
_diffrn_reflns_av_R_equivalents   0.0106
_diffrn_reflns_av_sigmaI/netI     0.0169
_diffrn_reflns_limit_h_min        -10
_diffrn_reflns_limit_h_max        4
_diffrn_reflns_limit_k_min        -12
_diffrn_reflns_limit_k_max        7
_diffrn_reflns_limit_l_min        -18
_diffrn_reflns_limit_l_max        17
_diffrn_reflns_theta_min          5.21
_diffrn_reflns_theta_max          69.96
_reflns_number_total              2099
_reflns_number_gt                 2058
_reflns_threshold_expression      >2\s(I)
 
_computing_data_collection        ?
_computing_cell_refinement        ?
_computing_data_reduction         ?
_computing_structure_solution     ?
_computing_structure_refinement   'SHELXL-97 (Sheldrick, 2008)'
_computing_molecular_graphics     ?
_computing_publication_material   ?
 
_refine_special_details
;
 Refinement of F^2^ against ALL reflections.  The weighted R-factor wR and
 goodness of fit S are based on F^2^, conventional R-factors R are based
 on F, with F set to zero for negative F^2^. The threshold expression of
 F^2^ > 2\s(F^2^) is used only for calculating R-factors(gt) etc. and is
 not relevant to the choice of reflections for refinement.  R-factors based
 on F^2^ are statistically about twice as large as those based on F, and R-
 factors based on ALL data will be even larger.
;
 
_refine_ls_structure_factor_coef  Fsqd
_refine_ls_matrix_type            full
_refine_ls_weighting_scheme       calc
_refine_ls_weighting_details
 'calc w=1/[\s^2^(Fo^2^)+(0.0470P)^2^+0.2135P] where P=(Fo^2^+2Fc^2^)/3'
_atom_sites_solution_primary      direct
_atom_sites_solution_secondary    difmap
_atom_sites_solution_hydrogens    geom
_refine_ls_hydrogen_treatment     mixed
_refine_ls_extinction_method      none
_refine_ls_extinction_coef        ?
_refine_ls_abs_structure_details
 'Flack H D (1983), Acta Cryst. A39, 876-881'
_refine_ls_abs_structure_Flack    0.09(19)
_refine_ls_number_reflns          2099
_refine_ls_number_parameters      166
_refine_ls_number_restraints      0
_refine_ls_R_factor_all           0.0298
_refine_ls_R_factor_gt            0.0290
_refine_ls_wR_factor_ref          0.0791
_refine_ls_wR_factor_gt           0.0781
_refine_ls_goodness_of_fit_ref    1.084
_refine_ls_restrained_S_all       1.084
_refine_ls_shift/su_max           0.069
_refine_ls_shift/su_mean          0.002
 
loop_
 _atom_site_label
 _atom_site_type_symbol
 _atom_site_fract_x
 _atom_site_fract_y
 _atom_site_fract_z
 _atom_site_U_iso_or_equiv
 _atom_site_adp_type
 _atom_site_occupancy
 _atom_site_symmetry_multiplicity
 _atom_site_calc_flag
 _atom_site_refinement_flags
 _atom_site_disorder_assembly
 _atom_site_disorder_group
O1 O 1.29347(13) 0.72014(13) 0.41838(7) 0.0348(3) Uani 1 1 d . . .
O2 O 0.89796(14) 0.86166(10) -0.01605(7) 0.0260(2) Uani 1 1 d . . .
O3 O 1.00320(12) 0.77289(9) 0.10559(6) 0.0207(2) Uani 1 1 d . . .
C1 C 0.89192(18) 0.60390(14) 0.38799(9) 0.0223(3) Uani 1 1 d . . .
H1A H 0.7940 0.6144 0.4204 0.027 Uiso 1 1 calc R . .
H1B H 0.9176 0.5118 0.3876 0.027 Uiso 1 1 calc R . .
C2 C 1.02133(18) 0.67708(14) 0.43647(9) 0.0228(3) Uani 1 1 d . . .
H2A H 0.9837 0.7636 0.4512 0.027 Uiso 1 1 calc R . .
H2B H 1.0446 0.6323 0.4917 0.027 Uiso 1 1 calc R . .
C3 C 1.17010(18) 0.68891(14) 0.38318(9) 0.0209(3) Uani 1 1 d . . .
C4 C 1.16405(17) 0.66729(13) 0.28464(9) 0.0186(3) Uani 1 1 d . . .
C5 C 1.02447(16) 0.65210(12) 0.24330(9) 0.0169(3) Uani 1 1 d . . .
C6 C 0.86712(16) 0.64968(13) 0.29193(10) 0.0187(3) Uani 1 1 d . . .
C7 C 0.75555(17) 0.55146(15) 0.24685(10) 0.0217(3) Uani 1 1 d . . .
H7A H 0.7975 0.4644 0.2548 0.026 Uiso 1 1 calc R . .
H7B H 0.6538 0.5549 0.2761 0.026 Uiso 1 1 calc R . .
C8 C 0.73232(17) 0.57640(15) 0.14785(10) 0.0235(3) Uani 1 1 d . . .
H8A H 0.6907 0.6634 0.1390 0.028 Uiso 1 1 calc R . .
H8B H 0.6569 0.5146 0.1241 0.028 Uiso 1 1 calc R . .
C9 C 0.88903(17) 0.56266(14) 0.09889(9) 0.0198(3) Uani 1 1 d . . .
H9 H 0.9185 0.4706 0.0944 0.024 Uiso 1 1 calc R . .
C10 C 1.02214(17) 0.64052(13) 0.14285(9) 0.0175(3) Uani 1 1 d . . .
H10 H 1.1234 0.6051 0.1230 0.021 Uiso 1 1 calc R . .
C11 C 0.88479(18) 0.62471(14) 0.00639(9) 0.0215(3) Uani 1 1 d . . .
H11 H 0.7788 0.6183 -0.0190 0.026 Uiso 1 1 calc R . .
C12 C 0.92467(17) 0.76567(14) 0.02706(9) 0.0204(3) Uani 1 1 d . . .
C13 C 1.00728(19) 0.56911(15) -0.05821(9) 0.0260(3) Uani 1 1 d . . .
H13A H 1.0026 0.6160 -0.1133 0.039 Uiso 1 1 calc R . .
H13B H 0.9853 0.4787 -0.0688 0.039 Uiso 1 1 calc R . .
H13C H 1.1106 0.5778 -0.0329 0.039 Uiso 1 1 calc R . .
C14 C 0.79375(17) 0.78778(13) 0.29121(10) 0.0236(3) Uani 1 1 d . . .
H14A H 0.8609 0.8466 0.3233 0.035 Uiso 1 1 calc R . .
H14B H 0.6919 0.7852 0.3189 0.035 Uiso 1 1 calc R . .
H14C H 0.7830 0.8172 0.2310 0.035 Uiso 1 1 calc R . .
C15 C 1.32226(17) 0.67115(16) 0.23965(10) 0.0264(3) Uani 1 1 d . . .
H15A H 1.3660 0.5850 0.2379 0.040 Uiso 1 1 calc R . .
H15B H 1.3916 0.7276 0.2722 0.040 Uiso 1 1 calc R . .
H15C H 1.3101 0.7034 0.1802 0.040 Uiso 1 1 calc R . .
 
loop_
 _atom_site_aniso_label
 _atom_site_aniso_U_11
 _atom_site_aniso_U_22
 _atom_site_aniso_U_33
 _atom_site_aniso_U_23
 _atom_site_aniso_U_13
 _atom_site_aniso_U_12
O1 0.0242(6) 0.0567(7) 0.0236(5) -0.0087(5) -0.0053(5) -0.0024(6)
O2 0.0322(6) 0.0247(5) 0.0211(5) 0.0034(4) -0.0037(5) -0.0004(4)
O3 0.0260(5) 0.0182(4) 0.0179(4) 0.0024(4) -0.0038(4) -0.0039(4)
C1 0.0226(7) 0.0218(7) 0.0225(7) 0.0028(6) 0.0038(6) -0.0002(6)
C2 0.0283(8) 0.0222(6) 0.0178(6) 0.0015(5) 0.0014(6) 0.0003(6)
C3 0.0218(7) 0.0205(6) 0.0203(7) -0.0006(5) -0.0026(6) 0.0030(6)
C4 0.0183(7) 0.0194(6) 0.0180(6) 0.0012(5) -0.0002(6) 0.0013(5)
C5 0.0193(7) 0.0126(6) 0.0189(6) 0.0007(5) 0.0003(5) 0.0009(5)
C6 0.0166(7) 0.0177(6) 0.0219(6) 0.0001(6) 0.0011(6) -0.0010(5)
C7 0.0170(7) 0.0218(6) 0.0264(7) 0.0013(6) 0.0013(6) -0.0043(5)
C8 0.0180(7) 0.0244(7) 0.0280(7) -0.0013(6) -0.0033(6) -0.0046(6)
C9 0.0196(7) 0.0184(6) 0.0214(6) -0.0011(6) -0.0033(6) -0.0016(6)
C10 0.0170(7) 0.0161(6) 0.0194(6) 0.0009(5) -0.0005(5) 0.0003(5)
C11 0.0206(7) 0.0232(6) 0.0208(6) -0.0028(6) -0.0045(6) -0.0009(5)
C12 0.0195(7) 0.0243(7) 0.0175(6) -0.0006(6) -0.0010(6) 0.0001(6)
C13 0.0267(7) 0.0303(7) 0.0210(6) -0.0061(6) -0.0026(6) -0.0005(7)
C14 0.0205(7) 0.0216(7) 0.0288(7) -0.0002(6) 0.0012(6) 0.0039(6)
C15 0.0173(7) 0.0388(8) 0.0231(7) -0.0028(7) -0.0016(6) -0.0009(7)
 
_geom_special_details
;
 All s.u.'s (except the s.u. in the dihedral angle between two l.s. planes)
 are estimated using the full covariance matrix.  The cell s.u.'s are taken
 into account individually in the estimation of s.u.'s in distances, angles
 and torsion angles; correlations between s.u.'s in cell parameters are only
 used when they are defined by crystal symmetry.  An approximate (isotropic)
 treatment of cell s.u.'s is used for estimating s.u.'s involving l.s. planes.
;
 
loop_
 _geom_bond_atom_site_label_1
 _geom_bond_atom_site_label_2
 _geom_bond_distance
 _geom_bond_site_symmetry_2
 _geom_bond_publ_flag
O1 C3 1.2168(19) . ?
O2 C12 1.2017(18) . ?
O3 C12 1.3596(16) . ?
O3 C10 1.4790(16) . ?
C1 C2 1.518(2) . ?
C1 C6 1.5357(19) . ?
C2 C3 1.501(2) . ?
C3 C4 1.5015(19) . ?
C4 C5 1.347(2) . ?
C4 C15 1.505(2) . ?
C5 C10 1.5178(18) . ?
C5 C6 1.5234(19) . ?
C6 C7 1.5410(19) . ?
C6 C14 1.5485(18) . ?
C7 C8 1.526(2) . ?
C8 C9 1.527(2) . ?
C9 C11 1.5322(19) . ?
C9 C10 1.5342(19) . ?
C11 C12 1.5185(19) . ?
C11 C13 1.534(2) . ?
 
loop_
 _geom_angle_atom_site_label_1
 _geom_angle_atom_site_label_2
 _geom_angle_atom_site_label_3
 _geom_angle
 _geom_angle_site_symmetry_1
 _geom_angle_site_symmetry_3
 _geom_angle_publ_flag
C12 O3 C10 109.46(10) . . ?
C2 C1 C6 113.63(12) . . ?
C3 C2 C1 113.05(12) . . ?
O1 C3 C2 120.82(12) . . ?
O1 C3 C4 119.93(14) . . ?
C2 C3 C4 119.19(13) . . ?
C5 C4 C3 120.25(13) . . ?
C5 C4 C15 125.44(12) . . ?
C3 C4 C15 114.24(12) . . ?
C4 C5 C10 118.76(12) . . ?
C4 C5 C6 123.42(11) . . ?
C10 C5 C6 117.80(12) . . ?
C5 C6 C1 109.73(11) . . ?
C5 C6 C7 109.74(11) . . ?
C1 C6 C7 107.40(11) . . ?
C5 C6 C14 109.53(11) . . ?
C1 C6 C14 109.99(12) . . ?
C7 C6 C14 110.42(11) . . ?
C8 C7 C6 113.59(12) . . ?
C7 C8 C9 110.10(12) . . ?
C8 C9 C11 112.34(12) . . ?
C8 C9 C10 112.64(11) . . ?
C11 C9 C10 101.13(11) . . ?
O3 C10 C5 107.92(10) . . ?
O3 C10 C9 103.59(11) . . ?
C5 C10 C9 118.72(12) . . ?
C12 C11 C9 101.80(11) . . ?
C12 C11 C13 109.48(12) . . ?
C9 C11 C13 113.95(12) . . ?
O2 C12 O3 121.18(12) . . ?
O2 C12 C11 128.95(12) . . ?
O3 C12 C11 109.85(11) . . ?
 
_diffrn_measured_fraction_theta_max    0.978
_diffrn_reflns_theta_full              69.96
_diffrn_measured_fraction_theta_full   0.977
_refine_diff_density_max    0.196
_refine_diff_density_min   -0.179
_refine_diff_density_rms    0.034
